# Supplementary material for: Emerging two-dimensional ferromagnetism in silicene materials
Source: PubMed Central journal article supplement (PMC5920055; doi:10.1038/s41467-018-04012-2), 2018-04-26
Supplement: 41467_2018_4012_MOESM1_ESM.pdf [file 41467_2018_4012_MOESM1_ESM.pdf]

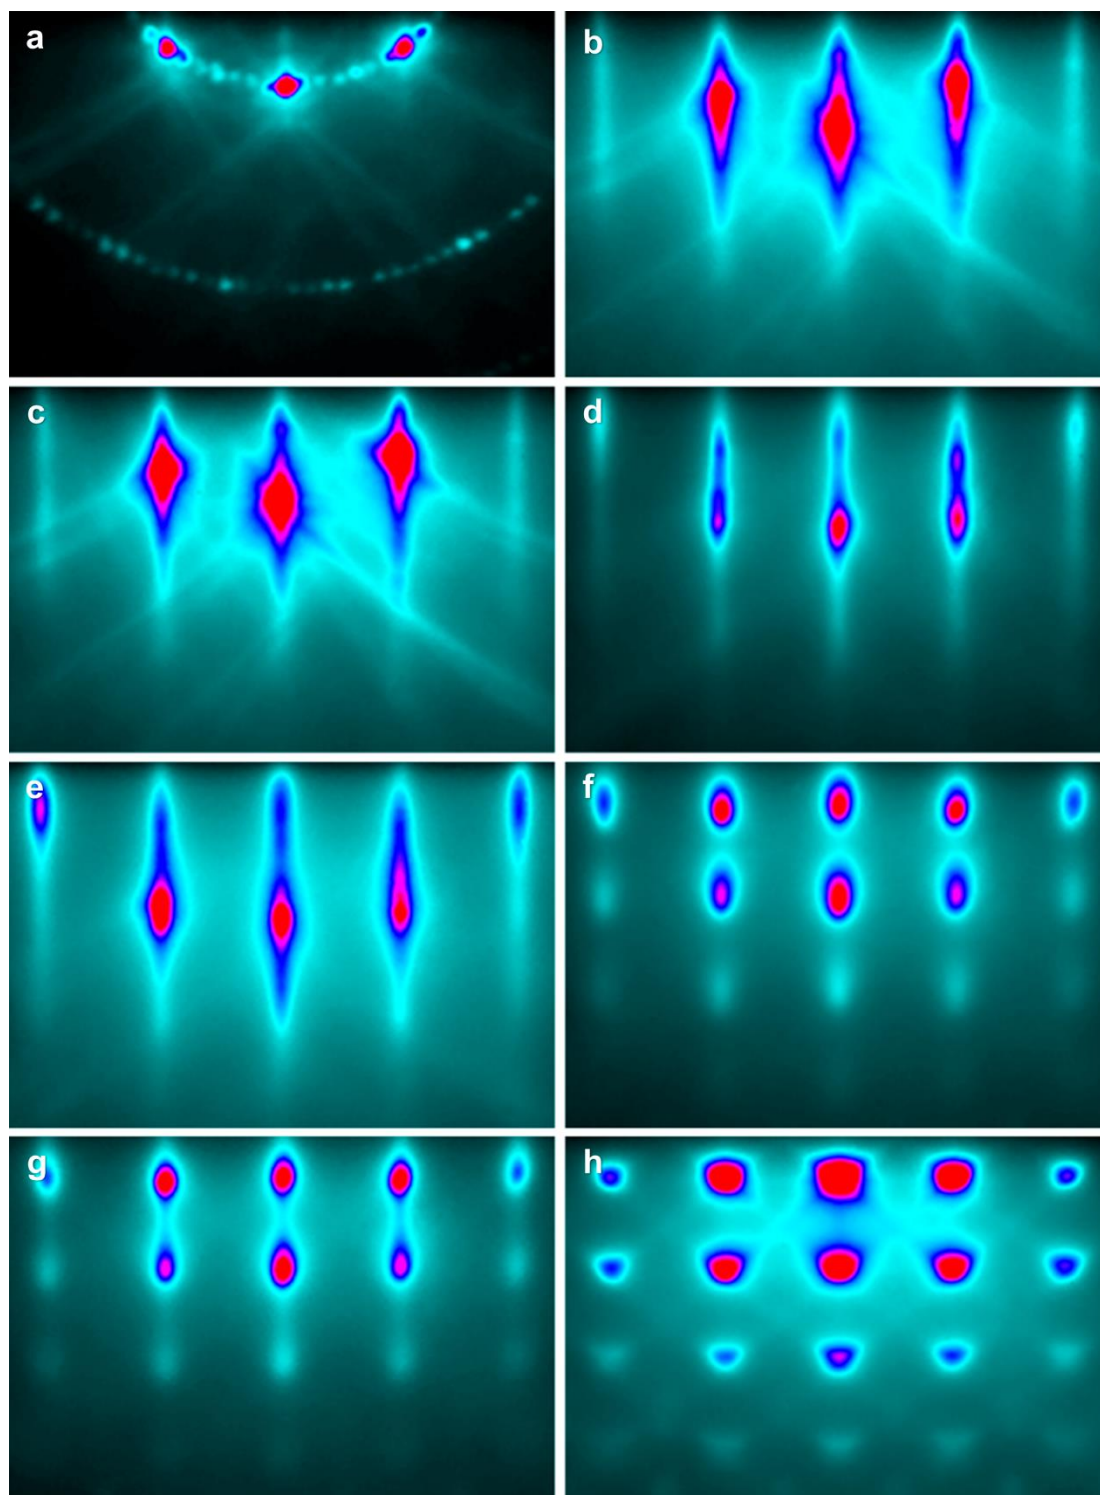

**Supplementary Figure 1. RHEED images of Si(111) and GdSi<sub>2</sub>.** (a) Reconstructed Si(111) surface; (b-h) GdSi<sub>2</sub> with thickness 1 ML (b), 1-2 ML (c), 2 ML (d), 3 ML (e),  $\cong$  9 ML (f),  $\cong$  17 ML (g),  $\cong$  160 ML (h). All images are along the  $[1\bar{1}0]$  azimuth of the Si substrate.

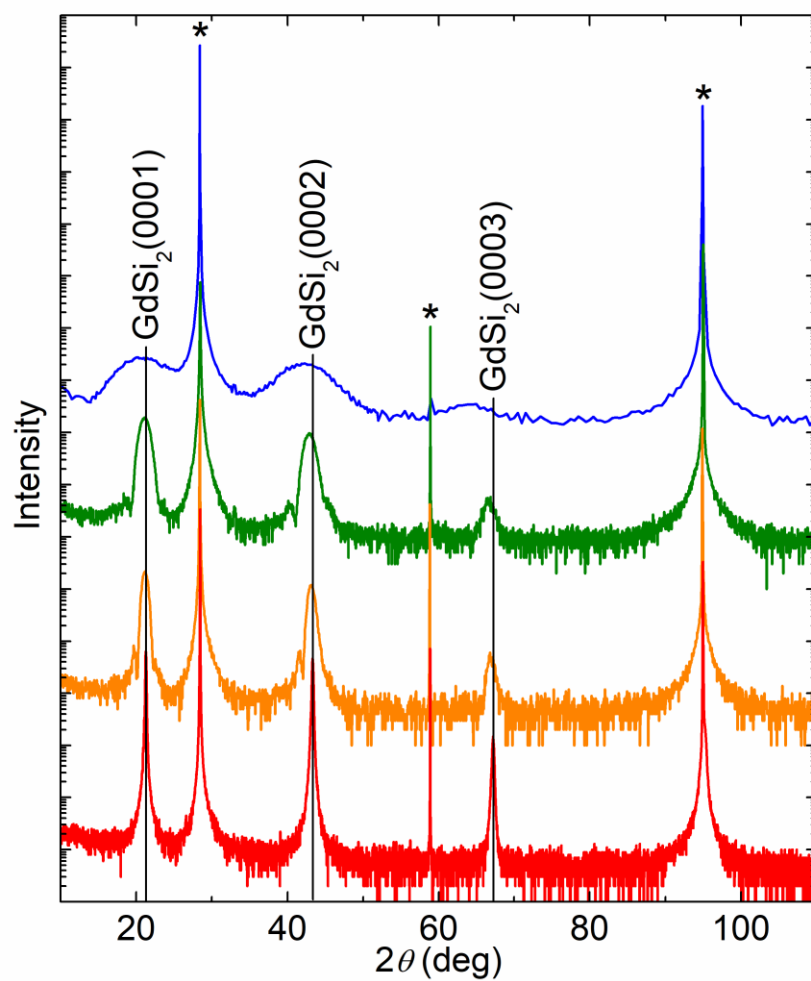

**Supplementary Figure 2. X-ray diffraction study of GdSi<sub>2</sub> on Si(111).**  $\theta$ - $2\theta$  diffraction scans for films with thickness 2 ML (blue),  $\cong$  9 ML (green),  $\cong$  17 ML (orange), bulk (red). Asterisk denotes peaks from the Si substrate.

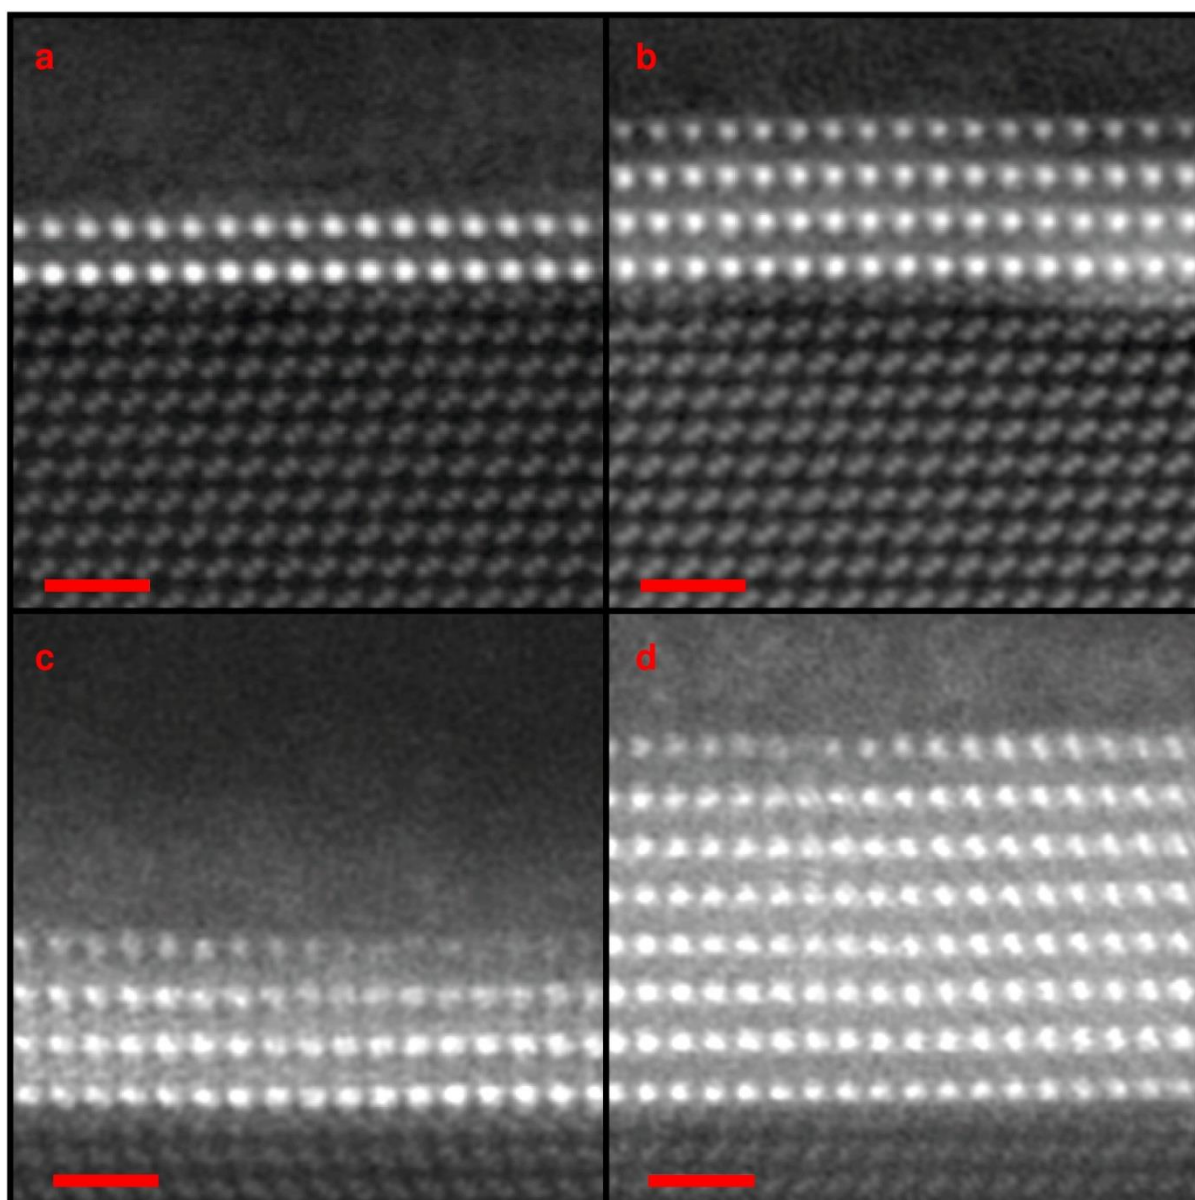

**Supplementary Figure 3. Electron microscopy of ultrathin films.** Cross-sectional HAADF-STEM images (viewed along the [110] zone axis of the Si substrate) of GdSi<sub>2</sub> films of (a) 2 ML and (b) 4-5 ML thickness and EuSi<sub>2</sub> films of (c) 4 ML and (d)  $\cong$ 8 ML thickness. Scale bar, 1 nm.

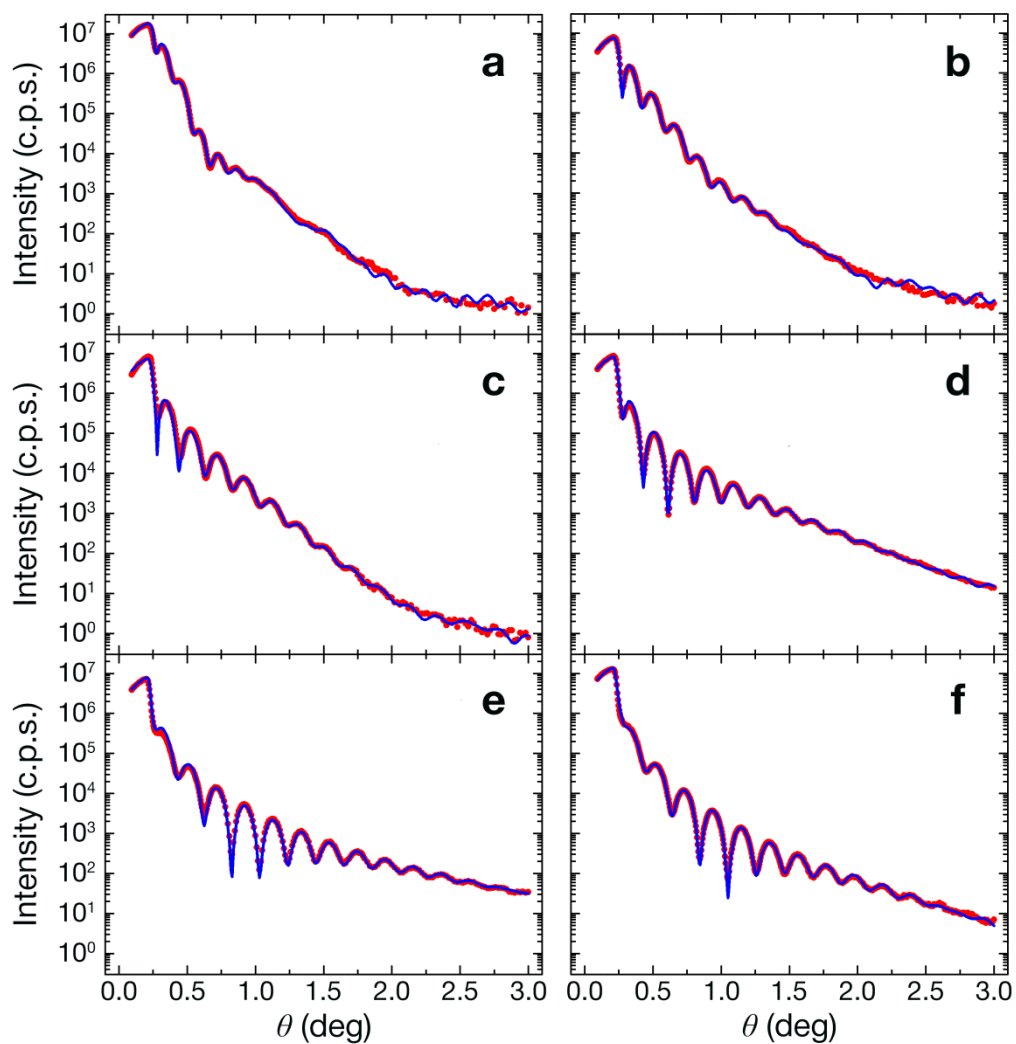

**Supplementary Figure 4. X-ray reflectivity study of the films.** Experimental curves (red) and theoretical fits (blue) for GdSi<sub>2</sub> on Si(111): **(a)**  $\cong$  17 ML; **(b)**  $\cong$  9 ML; **(c)** 4-5 ML; **(d)** 2 ML; **(e)** 1-2 ML; **(f)** 1 ML. The theoretical analysis relies upon a model based on lamellas with fitted parameters. This model is rather crude and the applicability of the analysis is limited.

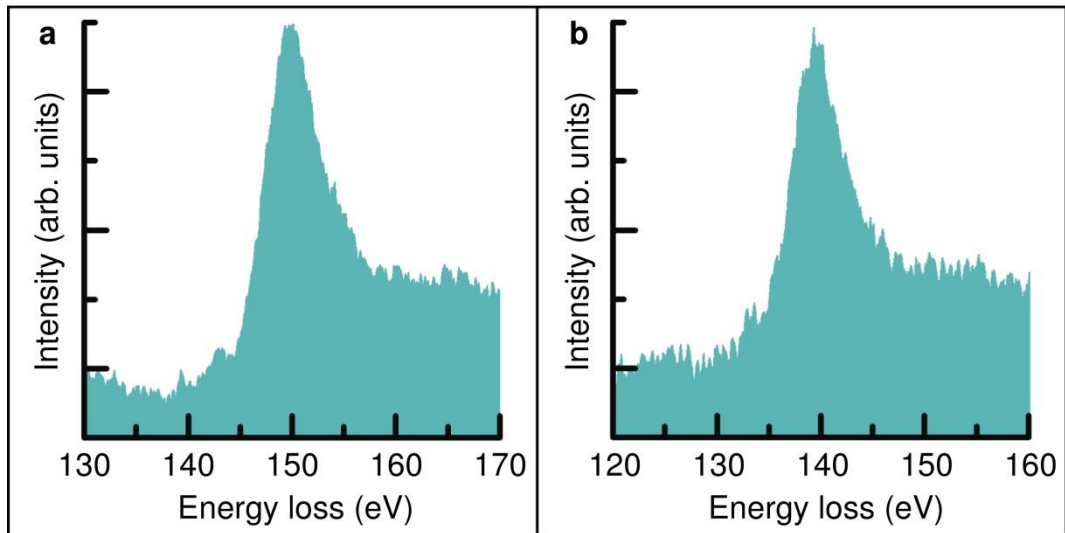

**Supplementary Figure 5. Electron energy loss spectra of the films.** The spectra of (a)  $\cong 9$  ML of  $\text{GdSi}_2$  and (b)  $\cong 8$  ML of  $\text{EuSi}_2$  show that the valence states of metal atoms are Gd(III) and Eu(II), respectively. Background is subtracted.

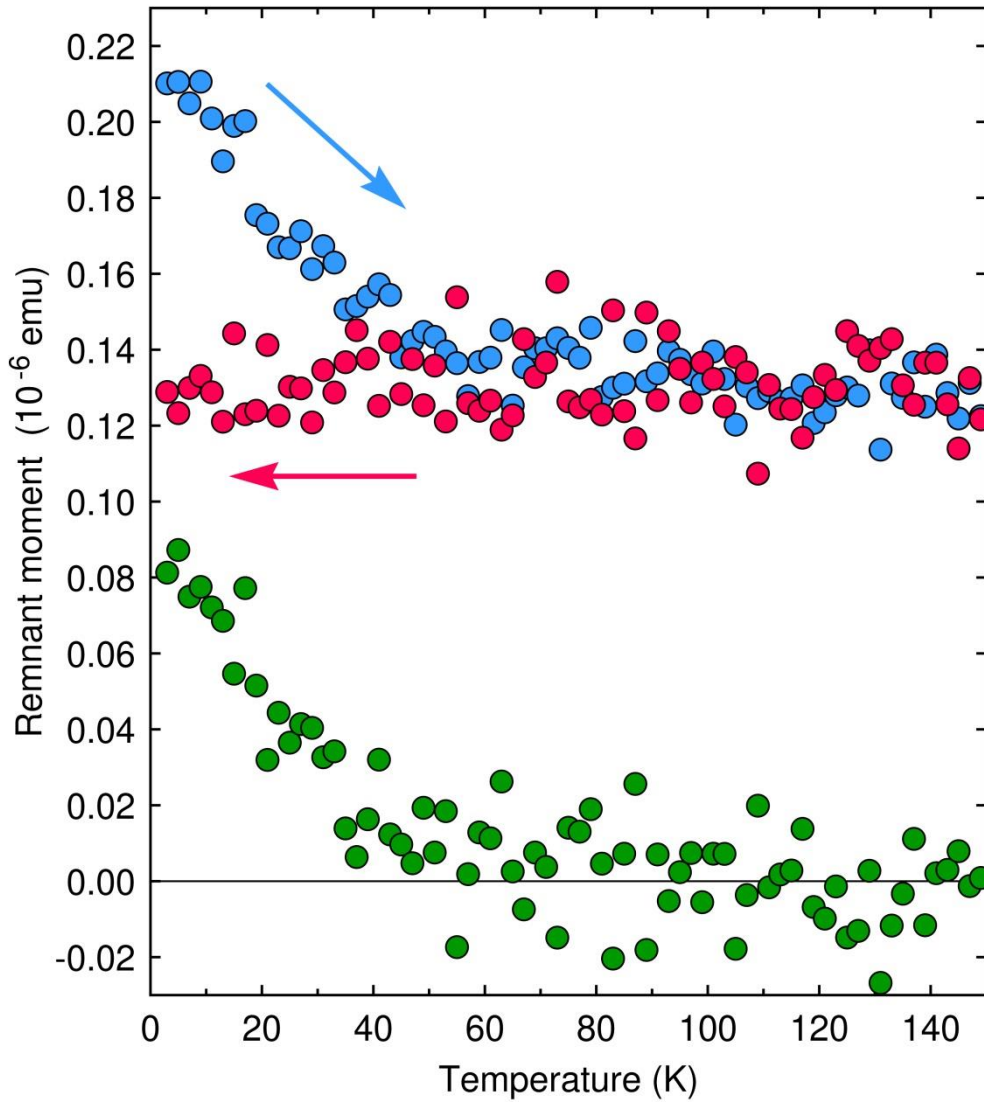

**Supplementary Figure 6. Temperature dependence of the remnant moment.** The moment is measured (after cooling in a magnetic field of 500 Oe) for the 17 ML sample of  $\text{GdSi}_2$ : heating up (blue), subsequent cooling down (red), the difference between them (green). Compare with Fig. 3f of the main text.

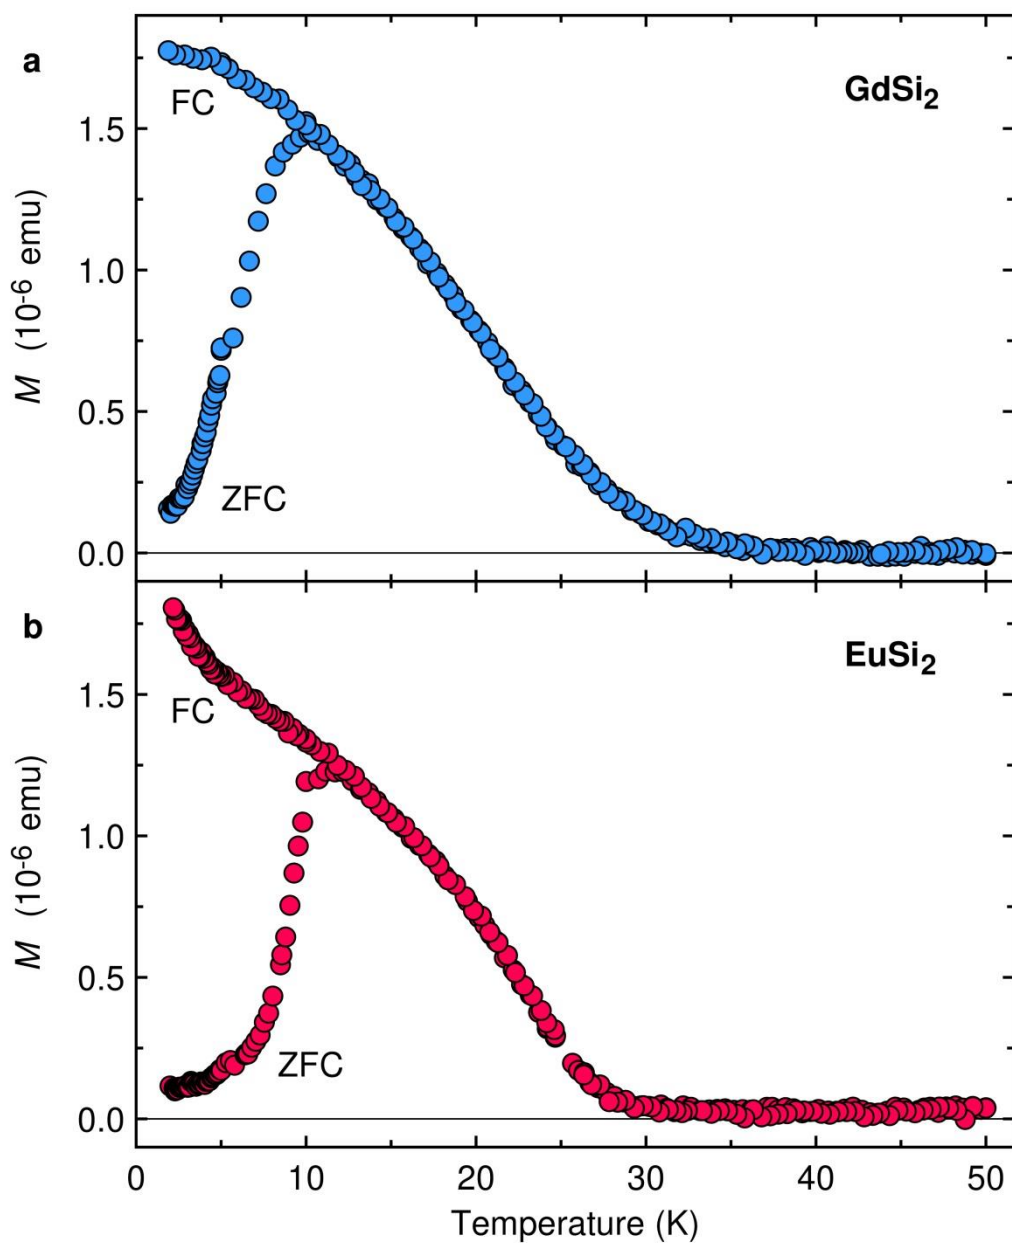

**Supplementary Figure 7. Magnetic measurements of ultrathin films.** Zero-field-cooled (ZFC) and field-cooled (FC) curves (50 Oe) for (a) 2 ML  $\text{GdSi}_2$ ; (b) 1-2 ML  $\text{EuSi}_2$ .

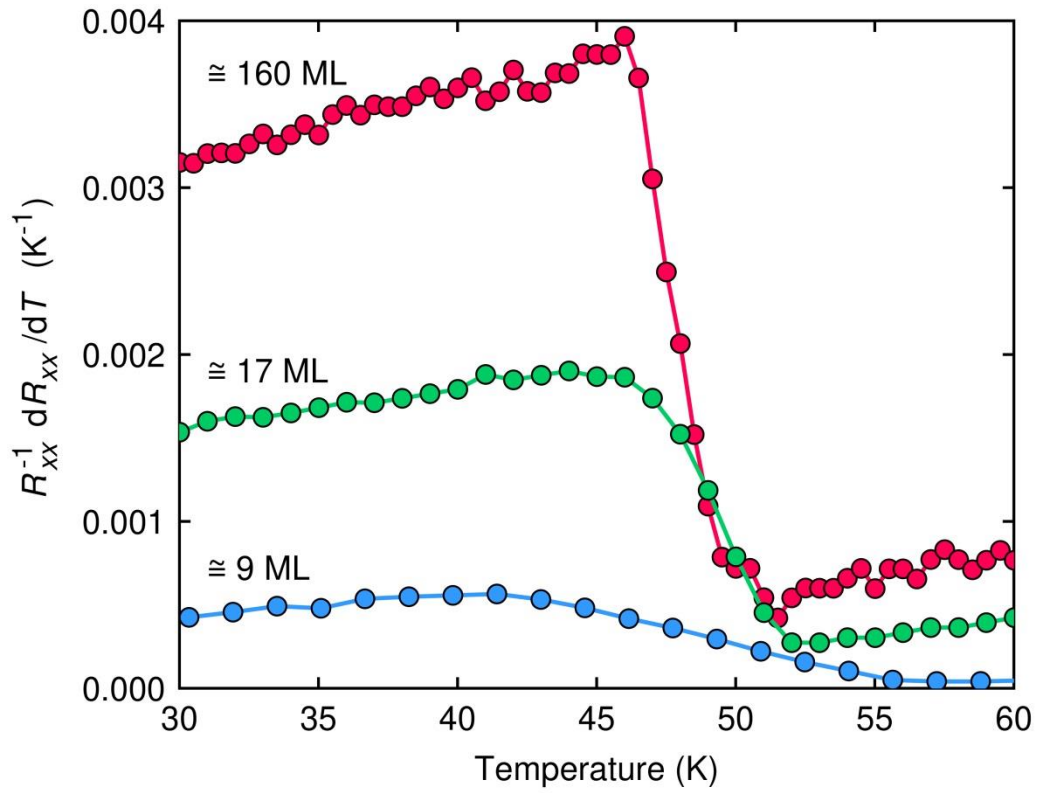

**Supplementary Figure 8. Temperature dependence of resistance.** Temperature coefficient of resistance for GdSi<sub>2</sub> films with a thickness  $\approx 160$  ML (red);  $\approx 17$  ML (green) and  $\approx 9$  ML (blue).



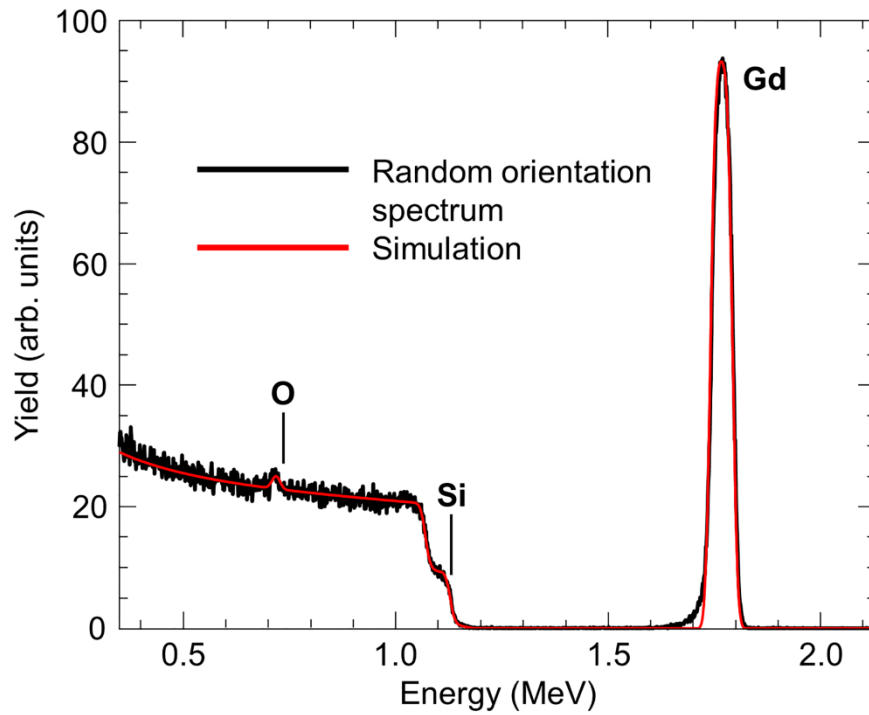

**Supplementary Figure 9. Rutherford backscattering spectrum.** The spectrum in random orientation (black) and its simulation (red) for bulk  $\text{GdSi}_2$  on  $\text{Si}(111)$  reveal the  $\text{GdSi}_{1.84}$  stoichiometry.

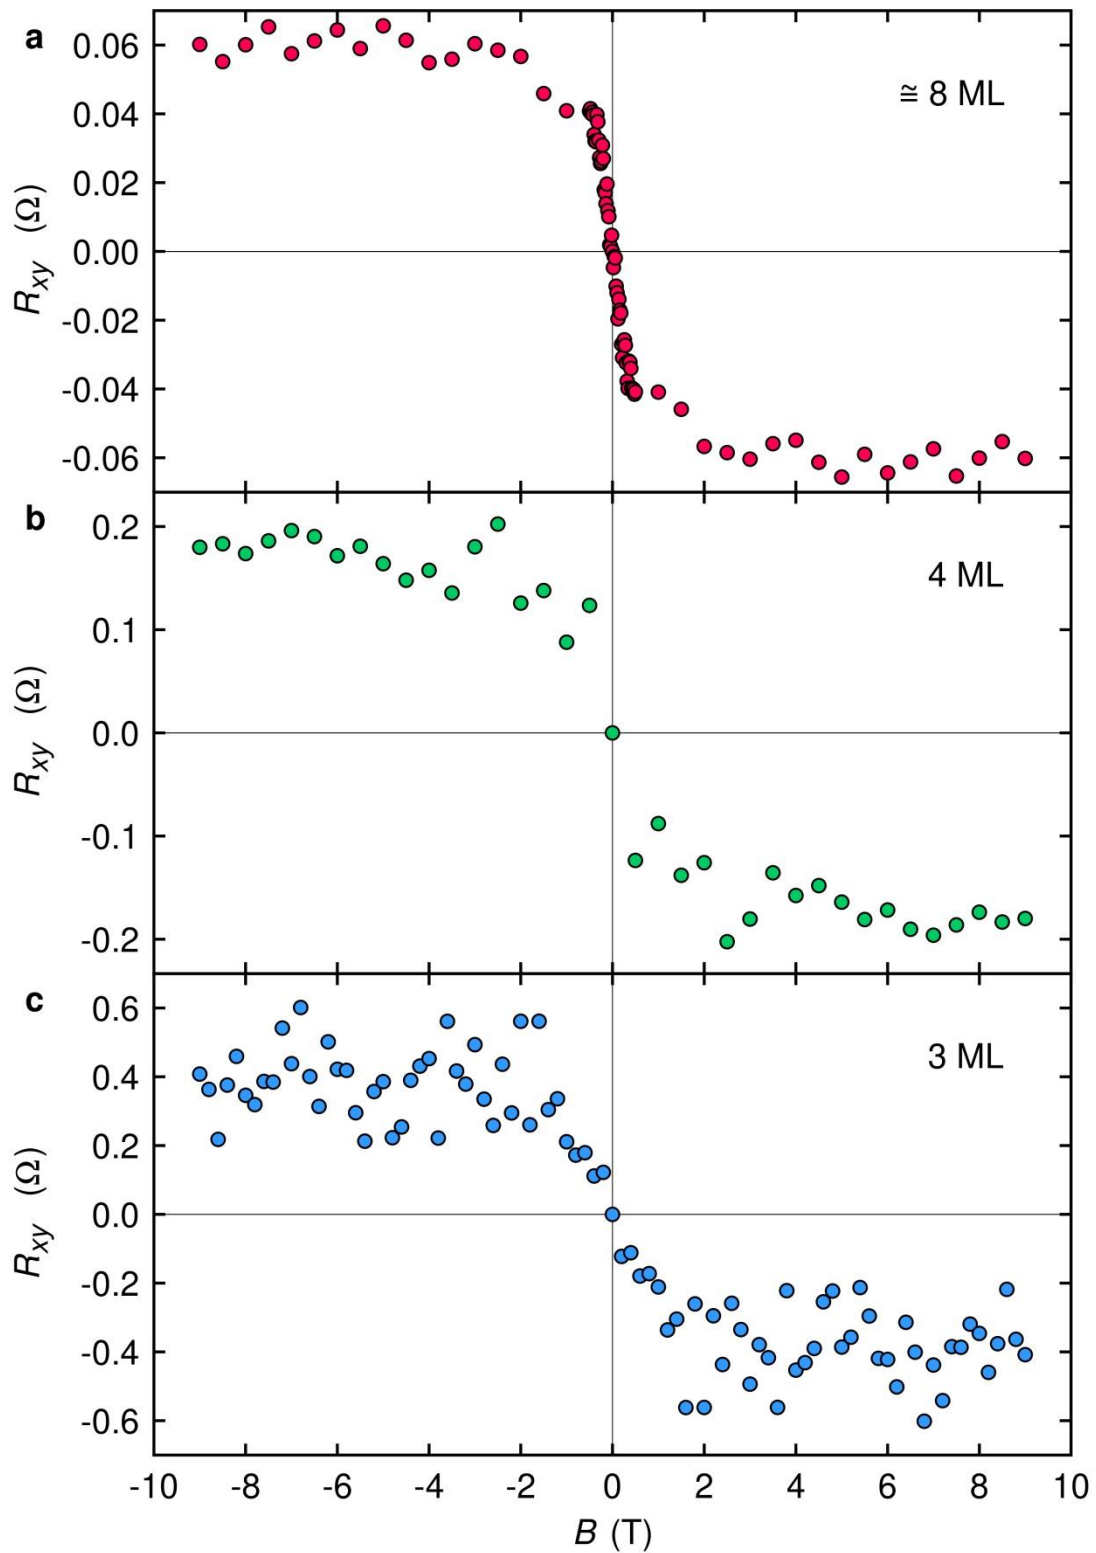

**Supplementary Figure 10. Anomalous Hall effect.** Hall resistance at 2 K demonstrates anomalous Hall effect in  $\text{EuSi}_2$  on  $\text{Si}(111)$ : **(a)**  $\approx 8$  ML (red); **(b)** 4 ML (green) and **(c)** 3 ML (blue). Note different scale of the effect for different film thickness.

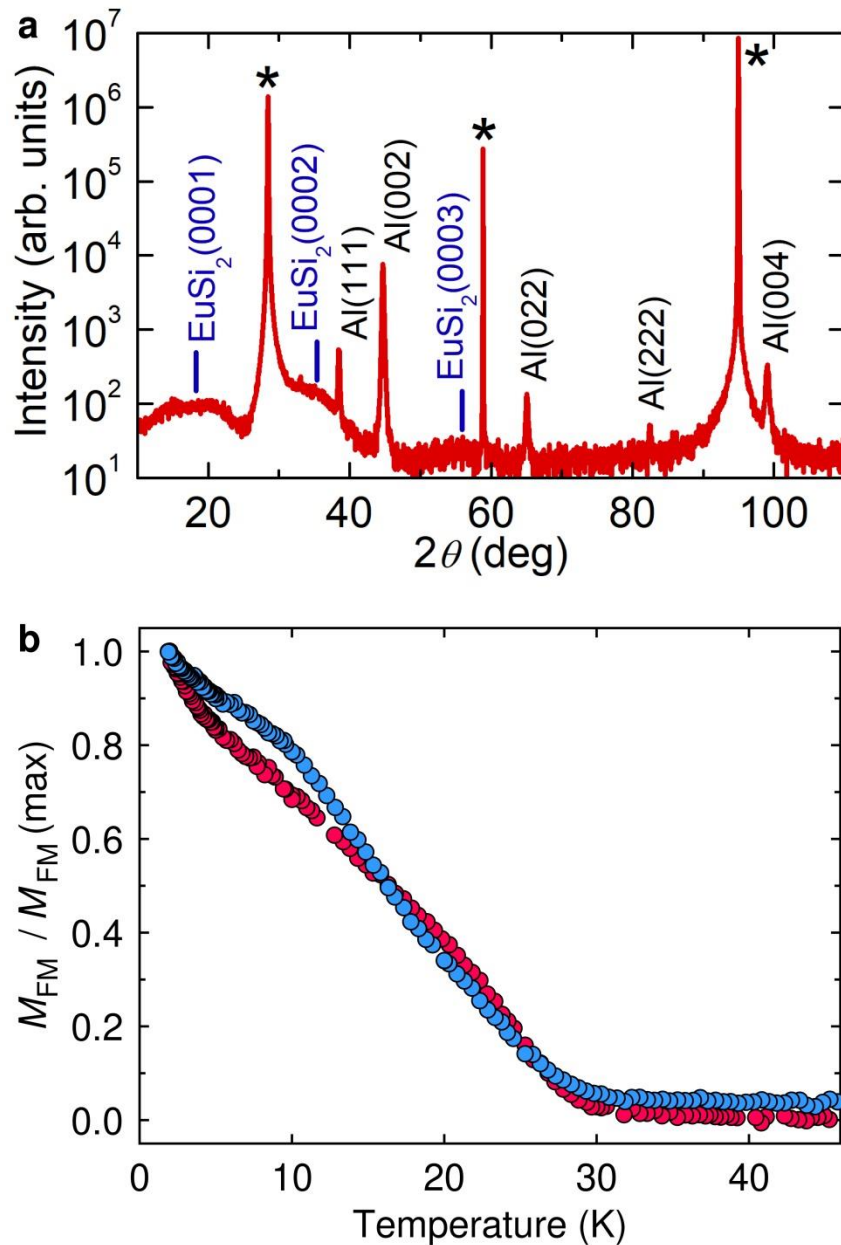

**Supplementary Figure 11. Study of the film of 3 ML of  $\text{EuSi}_2$  on  $\text{Si}(111)$  capped with 20 nm of Al. (a)  $\theta$ - $2\theta$  X-ray diffraction scan showing peaks from  $\text{EuSi}_2$  (the peaks are rather broad due to a very small thickness of the film), polycrystalline Al and the Si substrate (denoted by asterisk). (b) Comparison of 3 ML  $\text{EuSi}_2$  films with different capping: temperature dependence of magnetic moment in a magnetic field of 100 Oe:  $\text{SiO}_x/\text{EuSi}_2/\text{Si}(111)$  (red) and  $\text{Al}/\text{EuSi}_2/\text{Si}(111)$  (blue). The effective Curie temperatures are quite close; the difference in the form of the curves probably comes from a slight variation of growth parameters and resulting film thicknesses in two separate syntheses.**

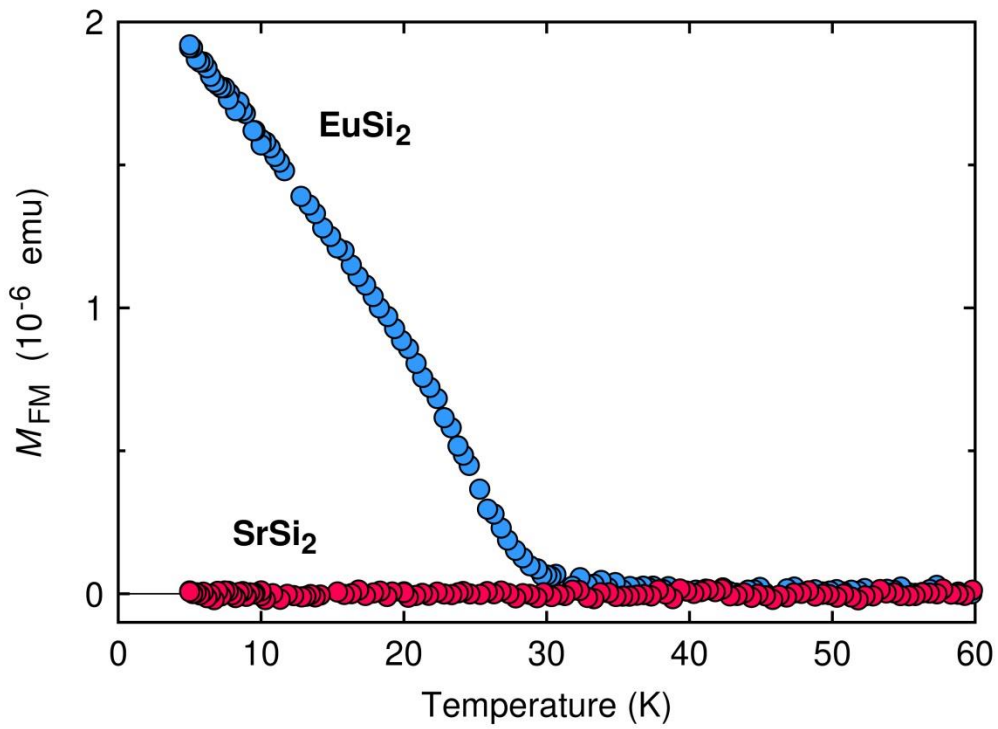

**Supplementary Figure 12. Comparison of magnetism in silicene-based silicides.**

Temperature dependence of magnetic moment in a magnetic field of 100 Oe: non-magnetic  $\text{SrSi}_2$  (red) and ferromagnetic  $\text{EuSi}_2$  (blue) of equivalent thickness ( $\approx 2 \text{ nm}$ ).
